# Supplementary material
Source: PubMed Central journal article supplement (PMC1866247)
Supplement: JCI0727628sd.pdf [file JCI0727628sd.pdf]

Supplementary Figure 1

**A** Hep-2 reactive antibodies from Cδ-CS B cells

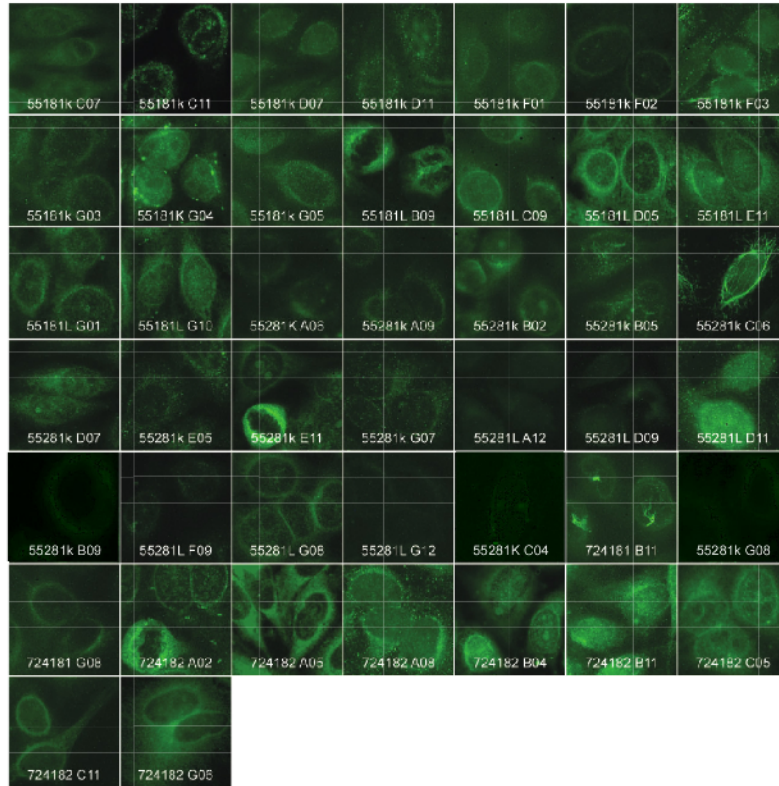

**B** Hep-2 reactive antibodies from naïve B cells:

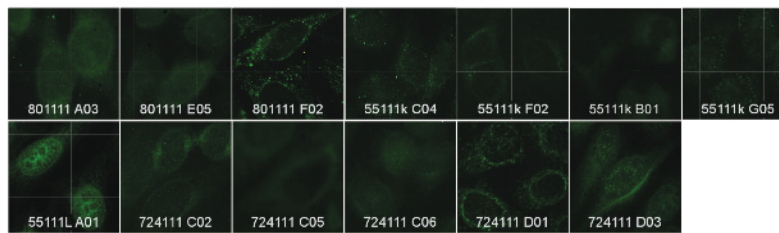

**C** Hep-2 reactive antibodies from IgG memory B cells:

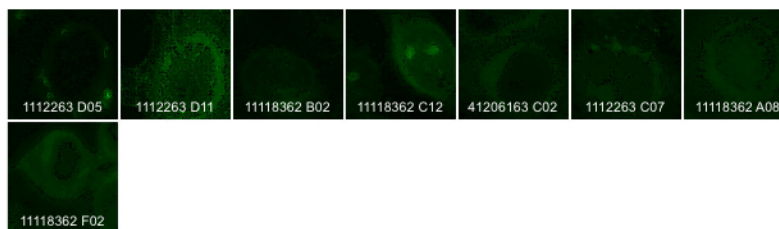

Cδ-CS Clones

| Heavy Chains        | FWR1                                                                  | CDR1                                      | FWR2                                      | CDR2                                                                                 | FWR3                                                                                              | CDR3                                                                     | FWR4                                              |
|---------------------|-----------------------------------------------------------------------|-------------------------------------------|-------------------------------------------|--------------------------------------------------------------------------------------|---------------------------------------------------------------------------------------------------|--------------------------------------------------------------------------|---------------------------------------------------|
| Anti-DNA-1:         | QVQLVESGGGVQVPGRSRLRSCAASGFTFS                                        | SYGMH                                     | WVRQAPGKGLEWVA                            | VISYDGSNKYYADSVKGG                                                                   | RFTISRDNKNTLYLQMNSLRAEDTAVYYCAK                                                                   | LNIRLLSYYGMDV                                                            | WGQGTTLVTVSS                                      |
| Anti-DNA-2:         | QVQLQQWAGALLKPS <sup>E</sup> TLSLTCAVYGGSF                            | GYYS                                      | WIRQPPGKGLEWIG                            | EINHSSTNYNPSLKS                                                                      | RVTISVDTSKNQFSLKLSVSTAADTAVYYCAR                                                                  | PRFIAARPOAKRNWFD <sup>P</sup>                                            | WGQGTTLVTVSS                                      |
| Anti-DNA-3:         | QVQLVQSGAEVKKPGASVKVSCRASGYTFT                                        | GYMH                                      | WVRQAPGQGLEWVG                            | WINPNSGGTNYAQKFGG                                                                    | RVTMT <sup>R</sup> DTSTISAYMELSLRSDDTAVYYCAR                                                      | DGGYGDYVGY                                                               | WGQGTTLVTVSS                                      |
| Anti-DNA-4:         | EVQLVQSGAEVKKPGESL <sup>I</sup> ISCKGSGYSFT                           | NYWIS                                     | WVRQMPGKGLEWVG                            | RIDPDSYTNYS <sup>P</sup> SPFQG                                                       | HVTISADK <sup>S</sup> ISTAYLQWSSLKASDTAMYCAR                                                      | RPPISSYYEYGM <sup>D</sup> V                                              | WGQGTTLVTVSS                                      |
| Anti-DNA-5:         | QVQLVQSGAEVKKPGASVKVSCRASGYTFT                                        | NYGIS                                     | WVRQAPGQGLEWVG                            | WISAYS <sup>G</sup> NTNYAQNLQD                                                       | RVTMT <sup>T</sup> DTSTSTAYMELSLRSDDTAVYYCAR                                                      | GYIYNSGSQFYFYGM <sup>D</sup> V                                           | WGQGTTLVTVSS                                      |
| Anti-DNA-6:         | QVQLQQWAGALLKPS <sup>E</sup> TLSLTCAVYGGSF                            | GYYS                                      | WIRQAPGKGLEWIG                            | EINHSSTNYNPSLKS                                                                      | RVTMLDTSKIQFSLNLT <sup>S</sup> VTAADTAVYYCAR                                                      | GLRGTTRFNYYGM <sup>D</sup> V                                             | WGQGTTLVTVSS                                      |
| Anti-DNA-7:         | EVQLVESGGGVQVPGGSRLRSCAASGFTFS                                        | IYWMS                                     | WVRQAPGKGLEWVA                            | NIKQDGS <sup>E</sup> KYYVDSVKG                                                       | RFTISR <sup>D</sup> YAE <sup>N</sup> SLYLQMNSLRAEDTAVYYCAS                                        | SPNYD <sup>W</sup> SGY <sup>I</sup> NAHW <sup>F</sup> DP                 | WGQGTTLVTVSS                                      |
| Anti-DNA-8:         | QLQLQESGPGLVKPS <sup>E</sup> TLSLTCTVSGGSIS                           | TSYYWA                                    | WIRQPPGKGLEWIG                            | SIYYS <sup>G</sup> TYYNPSLKG                                                         | RVTISD <sup>D</sup> TFKNQFSL <sup>L</sup> TLSVTAADTAVYYCAR                                        | GRPIIYSDNNK <sup>I</sup> L                                               | WGRGTLVTVSS                                       |
| Anti-DNA-9:         | EVQLVESGGGLV <sup>K</sup> PGGSLRRLSCAASGFTYS                          | NTWMN                                     | WVRQAPGKGLEWVG                            | RIK <sup>R</sup> K <sup>F</sup> EGE <sup>T</sup> RDYAAPV <sup>K</sup> G              | RFTISR <sup>D</sup> DSKNTLYLQMN <sup>S</sup> LQ <sup>T</sup> EDTAVYFCTS                           | DTTSTSDYGM <sup>D</sup> I                                                | WGP <sup>G</sup> TTLVTVSS                         |
| Anti-DNA-10:        | QVQLQESGPGLVKPS <sup>E</sup> TLSLTCTLSGG <sup>S</sup> IN              | SEYWS                                     | WIRQPPGQGLEWIG                            | YIYYTGSANYS <sup>P</sup> SLKS                                                        | RVTIS <sup>K</sup> DTSNQFSL <sup>R</sup> LTSVTAADTAVYYCAR                                         | TIDGYGN <sup>R</sup> FFYGM <sup>D</sup> V                                | WGQGTTLVTVSS                                      |
| Anti-DNA-11*:       | EVQLLES <sup>G</sup> GGLVQPGGSLRRLSCGASGFTFS                          | TYTMT                                     | WVRQAPGKGLEWVS                            | LISGGSGDTFYADSVKGG                                                                   | RFTISR <sup>R</sup> NNSKNTLFLQMN <sup>S</sup> LRV <sup>E</sup> DTAVYYCAK                          | ALRNLGDNQYSALH <sup>V</sup>                                              | WGQGTTLVTVSS                                      |
| Anti-DNA-12*:       | EVQLLES <sup>G</sup> GGLVQPGGSLRRLSCGASGFTFS                          | TYTMT                                     | WVRQAPGKGLEWVS                            | LISGGSGDTFYADSVKGG                                                                   | RFTISR <sup>R</sup> NNSKNTLFLQMN <sup>S</sup> LRV <sup>E</sup> DTAVYYCAK                          | ALRNF <sup>G</sup> DNQYSALH <sup>V</sup>                                 | WGQGTTLVTVSS                                      |
| Anti-DNA-13:        | QVQLQQWAGALLKPS <sup>E</sup> TLSLTCAVYGG <sup>P</sup> LN              | TYFWT                                     | WIRQPPGKGLEWVG                            | E <sup>A</sup> NHRG <sup>I</sup> SNY <sup>N</sup> PSL <sup>E</sup> S                 | RVTISV <sup>E</sup> TSK <sup>K</sup> YFSL <sup>R</sup> LSVSTAADTAVYFCAR                           | KDTGT <sup>Y</sup> FLGAS <sup>Y</sup> YYGL <sup>D</sup> V                | WGQGTTLVTVSS                                      |
| Anti-DNA-14:        | QVQLQQWAGALLKPS <sup>E</sup> TL <sup>L</sup> LTCNVYGA <sup>S</sup> FT | GYHWS                                     | WLRQSPGKGLEWIG                            | E <sup>I</sup> SHY <sup>R</sup> T <sup>N</sup> Y <sup>S</sup> PSL <sup>G</sup> R     | RVTMS <sup>F</sup> TTSKNQFSL <sup>R</sup> LTS <sup>L</sup> TAADTAVYYCAR                           | GLV <sup>K</sup> GG <sup>D</sup> SLTVVAGGAI <sup>S</sup> FR <sup>Y</sup> | WGQGTTLVTVSS                                      |
| Anti-DNA-15:        | QVQLVESGGGVQVPGMSLRLSCASLFTFS                                         | YSGMH                                     | WVRQAPGKGLEWVA                            | FIS <sup>K</sup> DGVN <sup>K</sup> YFADSVKGG                                         | RFTISR <sup>E</sup> K <sup>K</sup> R <sup>R</sup> LLYLHMS <sup>S</sup> LRV <sup>E</sup> DTAIYFCAR | NSDNMSAHHHNFY <sup>M</sup> DV                                            | WGT <sup>G</sup> TTLVTVSS                         |
| Anti-DNA-16:        | QVQLVQSGAEVKKPGASLRISCKASGYTFT                                        | SSAAH                                     | WVRQAPGQRLEWVG                            | WINTGHGDTTYSQK <sup>F</sup> QG                                                       | RVT <sup>F</sup> SRDTSAN <sup>I</sup> AYM <sup>Q</sup> L <sup>T</sup> GLT <sup>S</sup> EDTAVYYCAT | EDVATSGGNALH <sup>F</sup>                                                | WGQGTTLVTVSS                                      |
| Anti-DNA-17:        | QVQLQEWGATLLKPS <sup>E</sup> TLRLSCTAFGLN <sup>L</sup> R              | TYGMH                                     | WVRQARGKLEWVA                             | VTLQD <sup>G</sup> KR <sup>Q</sup> YYR <sup>D</sup> SVKGG                            | RFTISR <sup>R</sup> NNSKNTLFLQMN <sup>S</sup> LRV <sup>E</sup> DTAVYYCAT                          | GTLAAV <sup>E</sup> EQLPY <sup>F</sup> DF                                | WGQGTTLVTVSS                                      |
| Anti-DNA-18:        | QVQLQQWAGALLKPS <sup>E</sup> TLSLTCAVYGVSS <sup>R</sup>               | RYWMS                                     | WIRQPPGKGLEWIG                            | D <sup>I</sup> YRRGGANYS <sup>P</sup> SL <sup>K</sup> N                              | RVTMS <sup>L</sup> DS <sup>S</sup> GSQFSL <sup>R</sup> LSVSTAADTGLY <sup>C</sup> AR               | GPDALEATHDYS <sup>S</sup> SM <sup>H</sup> V                              | WKG <sup>G</sup> TTLVTVSS                         |
| Anti-DNA-19:        | EVQLVESGGGLV <sup>K</sup> PGGSLRRLSCASGFTFR                           | NAWMN                                     | WVRQAPGKGP <sup>E</sup> WIG               | L <sup>I</sup> K <sup>R</sup> K <sup>V</sup> DGAT <sup>T</sup> NYAAPV <sup>K</sup> G | RFTISR <sup>D</sup> DSK <sup>N</sup> LYLQMN <sup>S</sup> SLK <sup>T</sup> EDTAVYYCTT              | GLINS <sup>G</sup> WLSTFD <sup>Y</sup>                                   | WGQGTTLVTVSS                                      |
| Anti-DNA-20:        | QVQLQEWGATLLKPS <sup>E</sup> TLSLTCAVYGG <sup>S</sup> FG              | GSYWS                                     | WVRQARGKLEWIG                             | D <sup>I</sup> IQGGNSNY <sup>S</sup> PSL <sup>K</sup> G                              | RATNS <sup>L</sup> SDTSKNLLS <sup>L</sup> LTSVTAADTAVYYCAR                                        | VGGND <sup>F</sup> GN <sup>Y</sup> ETPPY <sup>A</sup> MD <sup>V</sup>    | WGQGTTLVTVSS                                      |
| Anti-DNA-21:        | QVQLVESGGGVQVPGRFLRLSCAVSGFTFS                                        | HFDMH                                     | WVRQAPGKGP <sup>E</sup> WMA               | FIS <sup>S</sup> DGRK <sup>K</sup> DY <sup>E</sup> DSV <sup>K</sup> G                | RFTISR <sup>D</sup> NSR <sup>E</sup> VLYVHLTSL <sup>R</sup> V <sup>E</sup> DTAVYECV <sup>K</sup>  | GRG <sup>D</sup> LEPF <sup>F</sup> DT                                    | WGQGTTLVTVSS                                      |
| Anti-DNA-22:        | QLVLQESGSGLVKPS <sup>Q</sup> ALSLTCAVSGGS <sup>F</sup> S              | SGDYWS                                    | WIRQPPGKGLEWIG                            | N <sup>I</sup> FHS <sup>G</sup> ITYYNS <sup>S</sup> SL <sup>K</sup> S                | RVSISVDRSKNQFSLKLSVSTAADTAIYCAR                                                                   | IDFGTMS <sup>F</sup> DS                                                  | WGQGTTLVTVSS                                      |
| <b>Light Chains</b> |                                                                       |                                           |                                           |                                                                                      |                                                                                                   |                                                                          |                                                   |
| Anti-DNA-1:         | DIQMTQSPSTLSASVGD <sup>R</sup> VTITC                                  | RASQSISSWLA                               | WYQQKPGKAPKLLIY                           | KASSLES                                                                              | GVPSRFSGSGSTEFLTITISSLQPD <sup>F</sup> FATYYCQ                                                    | QYNSYLYT                                                                 | FGQGT <sup>K</sup> VE <sup>I</sup> K              |
| Anti-DNA-2:         | EIVMTQSPATLSVSPGERATLSC                                               | RASQSVSSNLA                               | WYQQKPGQAPRLLIY                           | GASTRAT                                                                              | GIPARFSGSGSGTEFLTITISSLQSE <sup>D</sup> FVAVYYCQ                                                  | QYNNWPLT                                                                 | FGGGT <sup>K</sup> VE <sup>I</sup> K              |
| Anti-DNA-3:         | DIQMTQSPDLSAVLGERATINC                                                | KSSQSVLYSSNKNK <sup>N</sup> YLA           | WYQQKPGQPPKLLIY                           | WASTRES                                                                              | GVPDRFSGSGSGTDFTLITISSLQAE <sup>D</sup> VAVYYCQ                                                   | QYYSTSWT                                                                 | FGQGT <sup>K</sup> VE <sup>I</sup> K              |
| Anti-DNA-4:         | QSVLTQPPPSASGTPGQRVTI <sup>S</sup> C                                  | SGSSSNIGSN <sup>T</sup> VN                | WYQLPFGTAPKLLIY                           | SNNQRPS                                                                              | GVPDRFSGSKSGTSASLAI <sup>S</sup> GLQSE <sup>D</sup> EADYYCA                                       | AWD <sup>D</sup> SLNGHY <sup>V</sup>                                     | FGTGT <sup>K</sup> VT <sup>V</sup> L              |
| Anti-DNA-5:         | EIVMTQSPATLSVSPGERATLSC                                               | RASQSVSSNLA                               | WYQQKPGQAPRLLIY                           | GASTRAT                                                                              | GIPARFSGSGSGTEFLTITISSLQSE <sup>D</sup> FVAVYYCQ                                                  | LYNNWPWT                                                                 | FGQGT <sup>K</sup> VE <sup>I</sup> K              |
| Anti-DNA-6:         | DIQMTQSPSSLASVGD <sup>R</sup> VTITC                                   | RASQSI <sup>L</sup> SYLN                  | WYQQKPGKAPKLLIY                           | FESSLOS                                                                              | GVPSRFSGSGSGTDFTLITISSLQPE <sup>D</sup> FATYYCQ                                                   | QSYSTPYT                                                                 | FGQGT <sup>K</sup> VE <sup>I</sup> K              |
| Anti-DNA-7:         | EIVMTQSPGTLSVSPGERATLSC                                               | RASQSVGSNLA                               | WYQQKPGQAPRLLIH                           | GASTRAT                                                                              | GIPARFSGSGSGTEFLTITISSLQSE <sup>D</sup> DSAIYYCQ                                                  | QYNNWPFEGT                                                               | FGQGT <sup>K</sup> VE <sup>I</sup> K              |
| Anti-DNA-8:         | DIQMTQSPSTLSASVGD <sup>R</sup> VTITC                                  | RASQSIGWVA                                | WYQQKPGKAPKLLIY                           | KASTLES                                                                              | GVPSRFSGSRGTE <sup>F</sup> FLTITISSLQPD <sup>F</sup> FATYYCQ                                      | QYNTYWT                                                                  | FGQGT <sup>K</sup> VE <sup>I</sup> K              |
| Anti-DNA-9:         | QSVLTQPPPSASGTPGQRAT <sup>I</sup> SC                                  | SGSSSNIGR <sup>K</sup> TVN                | WYQQLPGAAPKLLIY                           | GNDRRPS                                                                              | GVPDRFSGSKSGTSASLAI <sup>S</sup> GLQSE <sup>D</sup> EADYYCA                                       | AWD <sup>D</sup> SLINAY <sup>V</sup>                                     | FGTGT <sup>K</sup> VT <sup>V</sup> L              |
| Anti-DNA-10:        | EIVLTQSPATLSLSPGERATLSC                                               | RASQSI <sup>T</sup> YVA                   | WYQQKPGQAPRLLIY                           | DASNRRAT                                                                             | GIPARFSGSGSGTDFTLITISSLAPD <sup>F</sup> FVAVYYCQ                                                  | QR <sup>T</sup> NWPR <sup>S</sup> F <sup>T</sup>                         | FGQGT <sup>R</sup> LE <sup>I</sup> K              |
| Anti-DNA-11*:       | AIQMTQSPSSLASVGD <sup>T</sup> VTITC                                   | RASQGI <sup>K</sup> DLG                   | WYQQKPGKAPKLLIY                           | RASNLP <sup>I</sup>                                                                  | GVPSRFSGSGSGTHFTLITIS <sup>R</sup> LQPE <sup>D</sup> FATYYCL                                      | QDFNPFPT                                                                 | FGPGT <sup>K</sup> V <sup>D</sup> IK              |
| Anti-DNA-12*:       | AIQMTQSPSSLASVGD <sup>T</sup> VTITC                                   | RASQGI <sup>I</sup> RDLG                  | WYQQKPGKPPKLLIY                           | SASNLP <sup>I</sup>                                                                  | GVPSRFSGSGSGTHFTLITIS <sup>R</sup> LQPE <sup>D</sup> FATYYCL                                      | QDFNPFPT                                                                 | FGPGT <sup>K</sup> V <sup>D</sup> IK              |
| Anti-DNA-13:        | EIVLTQSPGTLSLSPGERATLSC                                               | RASQSIDNNYLA                              | WYQQKPGQAPRLLLY                           | GASTRAT                                                                              | GIPDRFSGSDSGTDFTLITIT <sup>R</sup> LEPE <sup>D</sup> FVAVYYCQ                                     | QY <sup>G</sup> SSPNT                                                    | FGPGT <sup>K</sup> V <sup>D</sup> IK              |
| Anti-DNA-14:        | QSVLTQPPPSVSAAPGQKVTI <sup>S</sup> C                                  | SGSGSNIGNNS <sup>V</sup> S                | WYQQPPPAAPKLLMY                           | DNNKRRPS                                                                             | GIPERFSGSKSGTAA <sup>T</sup> LGLITGLQ <sup>T</sup> GDEADYYCG                                      | TWD <sup>S</sup> SLSE <sup>V</sup> L                                     | FGGGT <sup>K</sup> LT <sup>V</sup> L              |
| Anti-DNA-15:        | QSALTQPPPSASGSPGQSVTI <sup>S</sup> C                                  | TGTTSDVGG <sup>L</sup> TSVS               | WYQHHPGKPKLLIY                            | EVT <sup>K</sup> RRPS                                                                | GVPDRFSGSKSGNSASLTVSGLQAE <sup>D</sup> EADYYCS                                                    | SDG <sup>D</sup> NND <sup>V</sup> L                                      | FGGGT <sup>K</sup> LT <sup>V</sup> L              |
| Anti-DNA-16:        | QSVLTQPPPSVSGAPGQRVTI <sup>S</sup> C                                  | TGNNNSI <sup>G</sup> AGF <sup>D</sup> VH  | WYQQLPGTAPRLLIY                           | RSIYRPS                                                                              | GVPDRFSASRSATSASLAI <sup>T</sup> GLQPE <sup>D</sup> EGDYFCQ                                       | SYHISLSAYAV                                                              | FGGGT <sup>K</sup> LT <sup>V</sup> L              |
| Anti-DNA-17:        | DIQMTQSPSTLSASVGD <sup>R</sup> VNITC                                  | RASQSI <sup>S</sup> RWLA                  | WYQQE <sup>P</sup> PGKAPKLLIY             | KTSTLPS                                                                              | GVSSRFSGSGSGTEFLTITISSLQPE <sup>D</sup> FLTYCYCQ                                                  | QY <sup>D</sup> YPGT                                                     | FGQGT <sup>K</sup> VE <sup>I</sup> K              |
| Anti-DNA-18:        | QSALTQPPPSASGTPGQSVTI <sup>S</sup> C                                  | TATSSDFG <sup>D</sup> NEHS                | WYQQDFGKAPRLLIY                           | DVTRRPS                                                                              | AVPDRFSGSKSGNTASLTVSGLQPD <sup>E</sup> EADYYCS                                                    | SYAGNNFL                                                                 | FGGGT <sup>K</sup> LT <sup>V</sup> L              |
| Anti-DNA-19:        | DIQMTQSPSSLFASIG <sup>D</sup> RVTITC                                  | RTSQININ <sup>N</sup> YLN                 | WYQQKLG <sup>E</sup> APRLLIS              | RAF <sup>D</sup> LQ <sup>T</sup>                                                     | GVSPRFSGSGSGTDFSLTIS <sup>R</sup> LHP <sup>E</sup> DSGIYFCQ                                       | QTYSPFPT                                                                 | FGPE <sup>T</sup> KV <sup>D</sup> IK              |
| Anti-DNA-20:        | QSALTQPPPSASGSPGQSVTI <sup>S</sup> C                                  | TGSDSL <sup>D</sup> LGTS <sup>D</sup> YVS | WYQQY <sup>P</sup> PKAPKLLIY              | GLNLRPS                                                                              | GVPIRFSGSKSGNTASLTVSGLQSE <sup>D</sup> EADYYCS                                                    | SYYGS <sup>H</sup> NL <sup>V</sup> L                                     | FGGGT <sup>K</sup> LT <sup>V</sup> L              |
| Anti-DNA-21:        | DIQMTQSPSTLSASVGD <sup>T</sup> VTITC                                  | RASQNI <sup>R</sup> NYLA                  | WYQQKPGKAP <sup>E</sup> LLIY              | QSNLYPS                                                                              | GVPSRFSGAE <sup>F</sup> TEFLTITISLQAD <sup>F</sup> FATYYCQ                                        | QYKTLWT                                                                  | FR <sup>G</sup> GT <sup>K</sup> VE <sup>I</sup> K |
| Anti-DNA-22:        | QLVLTQSPSASASL <sup>G</sup> ASV <sup>K</sup> LTC                      | TLSSGSHSYAIA                              | WHQQQPE <sup>K</sup> GPRY <sup>L</sup> MK | LNSDGSHT <sup>K</sup> GD                                                             | GIPDRFSGSSGSAER <sup>Y</sup> LITISSLQSE <sup>D</sup> EADYYCQ                                      | TWATGI <sup>Q</sup> V                                                    | FGGGT <sup>K</sup> LT <sup>V</sup> L              |

**R** = Arginine      **E** = Glutamic Acid  
**D** = Aspartic Acid      Underline = Somatic Mutation  
**K** = Lysine      Highlight = Mutation Removed an Arginine

**Supplementary Figure 1.** Antibodies from C $\delta$ -CS B cells bind various antigens on HEp-2 cells with more intensity and frequency than antibodies from naive or IgG memory B cells. Micrographs of 63X magnification fields of the various C $\delta$ -CS (A), naive (B), and IgG memory (C) antibodies that bound HEp-2 slides as quantified in Figure 2A.

**Supplementary Figure 2.** The amino acid sequences of all clones reactive to DNA are compared from C $\delta$ -CS B cells. The sequences are sectioned into framework regions 1, 2 and 3 (FWR1, FWR2, and FWR3) and complementarity determining regions 1 and 2 (CDR1, and CDR2). The accumulation of charged amino acids (particularly arginine) is known to affect binding to DNA. Asterisks indicate a pair that is clonally related but has different mutations, and the color blue indicates the clones that were reverted to germline sequence for the experiments in Figure 5C. Underlined residues were introduced by mutation.
